# Supplementary material for: Large-effect flowering time mutations reveal conditionally adaptive paths through fitness landscapes in Arabidopsis thaliana
Source: PubMed Central journal article supplement — Proc Natl Acad Sci U S A. 2019 Aug 16;116(36):17890–9. doi: 10.1073/pnas.1902731116 (PMC6731683; doi:10.1073/pnas.1902731116), 2019-08-16
Supplement: pnas.1902731116.sapp.pdf [file pnas.1902731116.sapp.pdf]

## Supplementary Information for

Large-effect flowering time mutations reveal conditionally adaptive paths through fitness landscapes in *Arabidopsis thaliana*

Mark A. Taylor, Amity M. Wilczek, Judith L. Roe, Stephen M. Welch, Daniel E. Runcie, Martha D. Cooper, Johanna Schmitt

Author for correspondence : Mark A. Taylor  
Email: [maktaylor@ucdavis.edu](mailto:maktaylor@ucdavis.edu)

### **This PDF file includes:**

- Supplementary text for Results
- Supplementary text for Methods
- Figs. S1 to S7
- Tables S1 to S5
- References for SI reference citations

## **Supplemental Results**

Here we discuss genotype-specific results for the mutants for flowering time as well as their variation in relation to fitness. A great deal is known about the repressive and inductive genetic pathways that control flowering in *A. thaliana* (1-6). Specifically, the photoperiod pathway senses long days to accelerate flowering and interacts with the ambient temperature pathway since both contain overlapping thermosensors (7-10). Flowering is also accelerated by exposure to long-term cold, transduced by the vernalization pathway (11-13). Finally, the autonomous and hormone pathways promote flowering but are less sensitive to specific environmental stimuli. In most natural environments, these pathways induce a winter annual life history in which seeds germinate in the fall, overwinter as vegetative rosettes, and flower in the spring. However, other populations cycle more rapidly as spring and summer annuals in which all three life stages occur within a single season (14-17). These alternative phenologies result from both genetic variation and from variation in environmental signaling (16, 18).

## **Phenology delay**

The late-bolting cluster consisted mostly of lines with presumed high *FLC* expression (i.e. Col *FRI*), impaired *FLC* downregulation (i.e. *FRI:vin3*, *FRI*), or positive photoperiod integrators (i.e. *gi*). Functional *FRI* lines were generated by introgressing a strong functional *FRI* allele from the Sf-2 ecotype into *fri*-non-functional backgrounds. This introgression is known to result in high *FLC* expression, thus conferring a vernalization requirement. Lines with presumed high *FLC* activity delayed bolting in most environments, but especially so in the fall when the *FRI:vin3* mutant was extremely late-bolting. *VIN3*

functions to register vernalizing cold and maintain the silencing of *FLC*, so without it even brief periods of warmth can erase repressive epigenetic *FLC* marks (11, 19, 20). In *FRI:vin3*, a strong *FRI* expressing a potent *FLC*-mediated floral repression was coupled with an impaired *vin3* leading to its inability to register vernalizing cold.

The autonomous pathway was also an important component of the delayed cluster because *ld* and *fve* could not downregulate *FLC*, even in the present of other inductive signals like vernalizing cold in the fall and longdays in the summer. Downstream (but not upstream) photoperiod mutants delayed bolting, especially *gi*. Finally, impairment of the ultimate integrator of all these pathways, the florigen *ft*, delayed flowering across most plantings but not as severely as the autonomous or vernalization mutants, indicating that the loss of function of *FT* may be partially compensated by other integrators such as *TSF*.

### **Phenology acceleration**

The early-bolting cluster showed a mix of pathways with many upstream photoperiod mutants, and the most consistently early-bolting mutants were deficient in *PHYB*. In fact, *phyb+a/d/e* mutants form a subcluster that is constitutively fast-bolting across all plantings. *PHYD/E* obligately heterodimerize with *PHYB* but *PHYB* does not depend upon *PHYD/E* (21, 22), so that it might be expected that a *phyb* mutant would be more extreme than *phye* or *phyd*. Indeed, the data supported this expectation since single phytochrome mutants (*phyd* and *phye*) accelerated less than *phyb* or mixed double mutants (*phybe* or *phybd*). Furthermore, these obligately heterodimerizing mutants accelerated more than double mutants in genes that do not interact (such as *phyad*). *PHYB* also functions to integrate night-time temperature information (23) and is especially important

during seasons with large differences between day and night-time temperatures, which may explain why *phyb* mutants are more likely to show sign plasticity across plantings.

The vernalization mutants present in the accelerated cluster were characterized by deficiencies in *FLC* either due to loss-of-function in its obligate enhancer *FRI* (in the *hua:fri* double mutant) or in *FLC* itself (in the *FRI:flc* mutant). Furthermore, mutations generated in the Col *FRI* background accelerated bolting relative to Col *FRI*, representing a two-step mutational path from Col to Col *FRI* to Col *FRI*+mutation (i.e. *FRI:frl*).

### **Phenology-fitness variation**

These mutants were chosen to expand phenological variation, but we also observed that environments compressed and expanded the amount of variation that mutants expressed. For example, in Norwich fall bolting time varied between 7 and 18 thousands of accumulated photothermal units (kBPTU) while in Norwich summer it varied between 5 and 10 kBPTU. This is likely driven by the autumnal window of sensitivity in late fall that forces plants to balance the benefit of rapidly flowering before winter or waiting until spring, which is governed by the vernalization requirement in *FRI-FLC* functional genotypes (15). However, variation in phenology did not correlate to variation in fitness. This is seen in the opposite phenology and fitness variation trends between Halle fall (with greater fitness variation and lesser phenological variation) and Norwich fall (with lesser fitness variation and greater phenological variation). This points to the possibility of a trade-off between the sizes of phenological space and fitness space available to mutant plants in different environments. As new mutants explore fitness landscapes, marginal differences in phenotypes may be dampened relative to marginal differences in fitness. For

example, in both Valencia fall and Halle fall, *co* decreased fitness relative to its ecotype background Col. However, in Halle fall it caused an approximate 5k seed proxy unit fitness decrease concomitant with 2 kPTU acceleration in bolting time, while in Valencia it caused a 7k seed proxy unit fitness decrease but a 1 kBPTU acceleration. This jaggedness in the relationship between mutant and ecotype background indicates that genotype-by-environment interaction is playing an outsized role determining how traits will be selected upon and which mutations will prove sufficiently adaptive to escape loss by drift.

### **Supplemental Methods**

After field transplantation in order to ensure establishment and ameliorate transplant shock, plants were watered for one week. Growth plots were protected from herbivory by fences and molluscicide, and those plants that suffered herbivore wounding were excluded from our analyses. See Wilczek *et al.*, 2009 for further details (24).

Temperatures in the greenhouses were measured every 15 minutes by HOBO probes (HOBO H8 Pro Series, Onset Computer Corporation, Bourne, MA) interspersed randomly among growth benches. For field sites, temperature at rosette height (~1.5 cm above soil surface) was measured every 6 minutes by 5 thermistor temperature probes (model 107-I, Campbell Scientific Inc, Logan, UT) covered to prevent insolation. To calculate hourly temperatures used for photothermal time calculations, the ten measurements for each hour was averaged. Temperature data were curated and corrected as in Wilczek *et al.*, 2009.

Days to flowering was the number of days from field transplant until the petals of a plant's first flower were fully extended from its sepals. Initial leaf number was the number

of fully unfurled, non-cotyledonous leaves in the rosette at the time of field transplant. Leaf length at bolting was the length of the longest leaf from the center of the rosette to that leaf's apex on the day of bolting. Main branch number indicated whether there was a single or multiple primary inflorescence shoots emerging from the rosette canopy. Cauline branch number was the number of branches originating from the axils of cauline leaves. The number of basal branches were the number of shoots that originated from the same rosette level as the primary inflorescence shoot. The number of higher order branches were the number that branched from cauline branches and were longer than 1cm.

To scale phenological measurements to photothermal time, we used the following equations:

$$\text{photothermal unit } PTU(t) = \begin{cases} [T(t) - T_b] \times P, & T(t) > T_b \\ 0, & \text{otherwise} \end{cases}$$

$$P = \begin{cases} 1, & \text{Sunrise} < t < \text{Sunset} \\ 0, & \text{otherwise} \end{cases}$$

$$\text{accumulated photothermal units (PTUs)} = \sum_{t=1}^{t=\text{trait end}} PTU(t)$$

where  $t$  is hour,  $T(t)$  is the temperature at hour  $t$ ,  $T_b$  is the base temperature which was held constant at 3°C as in Chew *et al.*, 2012 (23);  $P$  was photoperiod filter with a non-zero value only in daylight;  $t=1$  is the 12<sup>th</sup> hour of the day of germination; and  $t=\text{trait end}$  is the 12<sup>th</sup> hour of the day when a plant either bolted or flowered. The purpose of this scaling was not to model genotype-specific photothermal phenology, but rather to provide a uniform scaling to compare across genotypes while simultaneously reflecting the dominant effect of daytime temperature on setting overall phenology. Our photothermal scaling accomplishes this without attempting to parameterize the complex, environment-specific

transformations that genotype-specific photothermal time models entail. Finally, the qualitative pattern of bolting (Fig. S3) and selection (Table S1) is the same when evaluating phenology in real time (Julian days) or in our estimate of photothermal time, so increasing complexity of the photothermal time model is unlikely to yield little useful results to answer the questions of selection on phenology among our mutant populations.

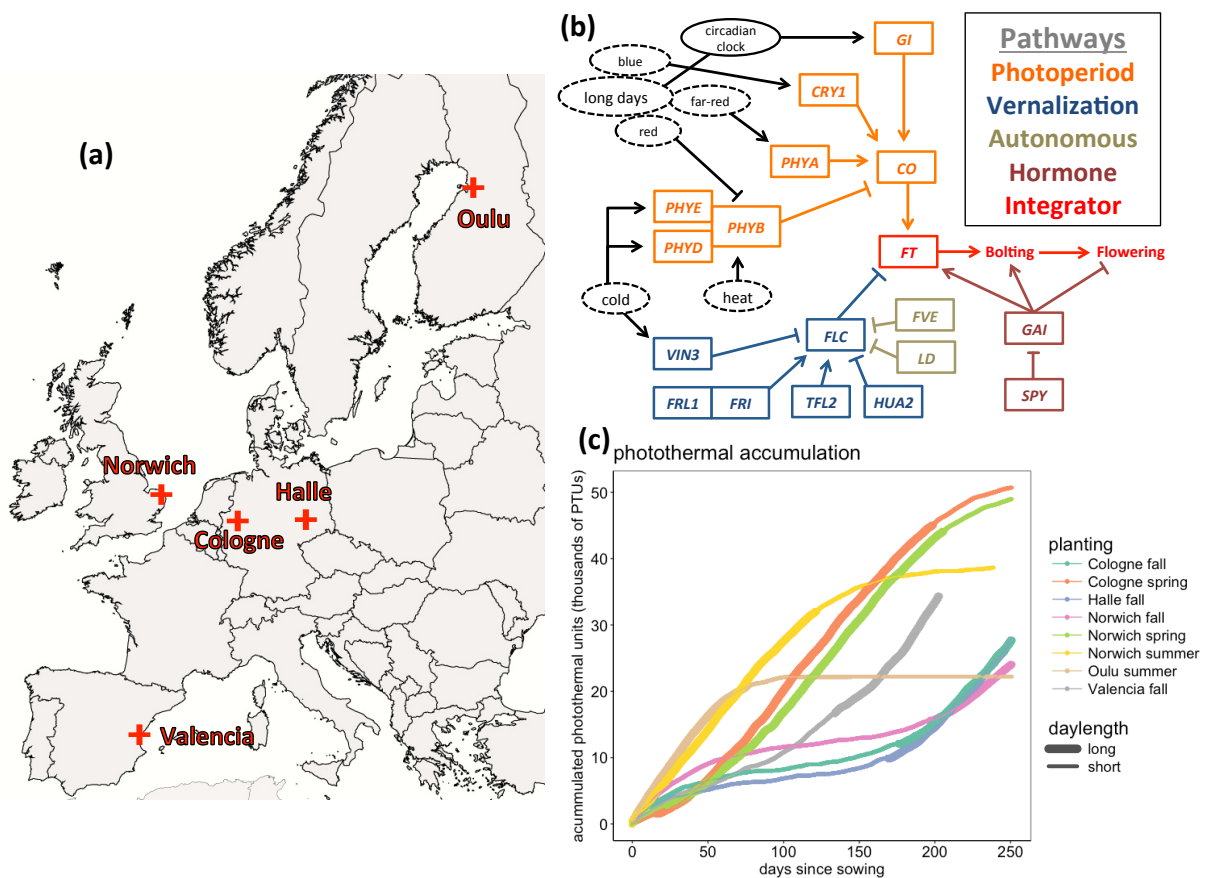

**Fig. S1. (a)** Locations of field sites in this experiment. **(b)** Primary network interactions of flowering time genes manipulated in this experiment. Genes are shown in solid rectangles, and environmental signals in dashed ovals. For genes, arrows mean that a functional allele has a positive effect on its downstream partner; blunt ends, a negative effect. For an environmental variable, arrows mean that it upregulates a gene; blunt ends, downregulates. **(c)** Accumulation of photothermal units from the date of sowing for each planting, which scales developmental progress by times when photosynthetically active radiation and temperature promote the transition from vegetative growth to reproduction.



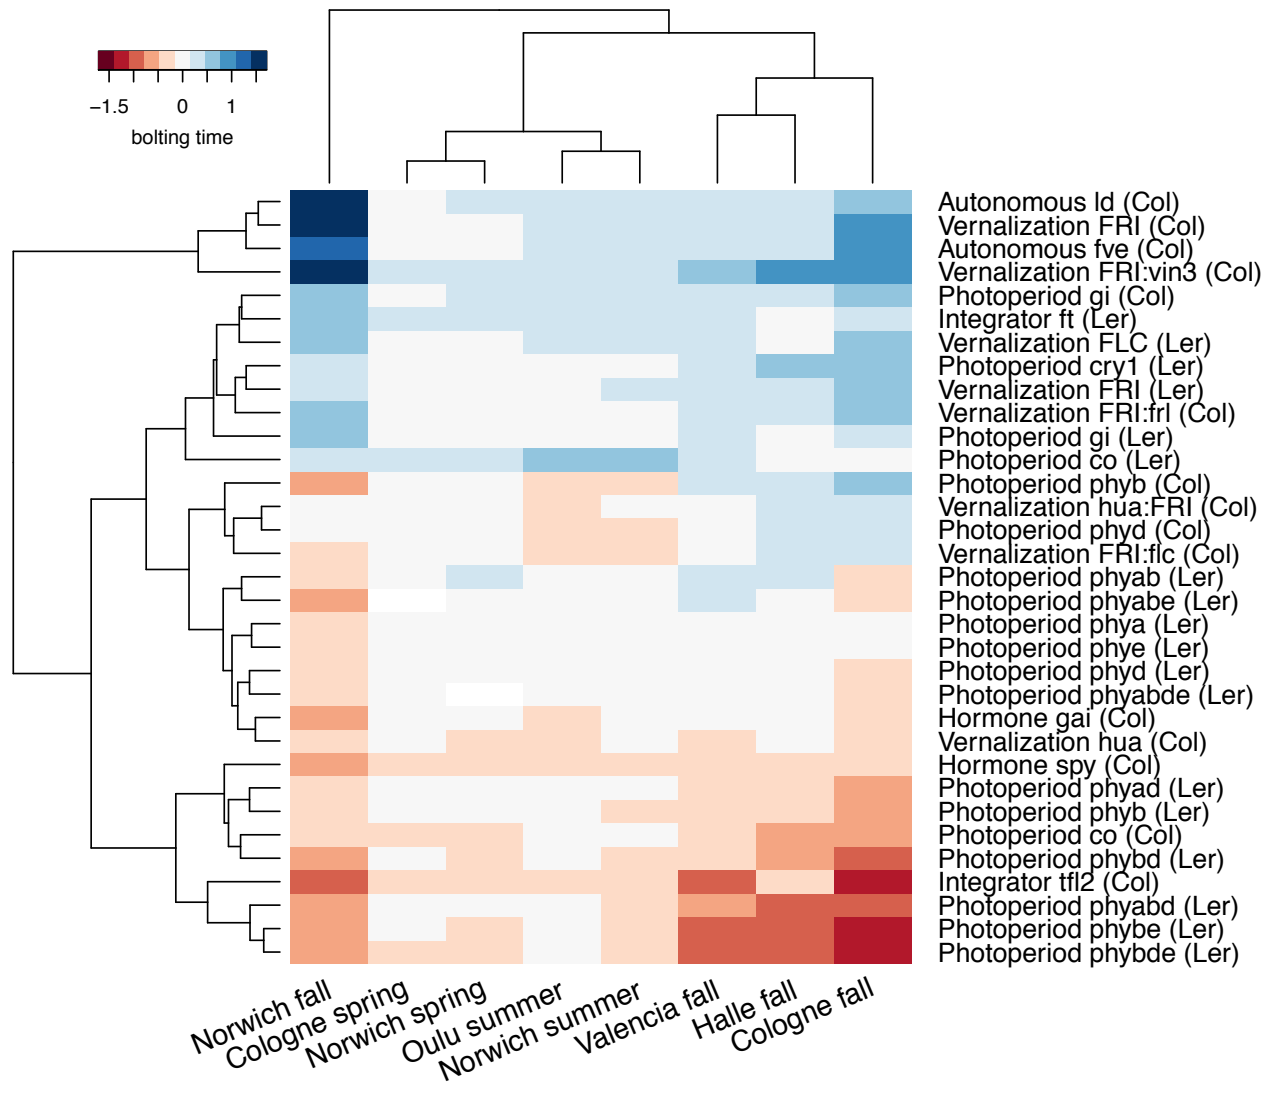

**Fig. S2.** Heatmap of days to bolting in calendar time in *Arabidopsis thaliana* using Euclidian, average-based clustering for both genotype (rows) and planting (columns) relative to ecotype background after  $\log_2$  transformation. The first word of the row identifiers show how lines are classified according to their traditional pathway designation. Subsequent lowercase gene names indicate loss-of-function alleles; uppercase, gain-of-function. Colons between pathways or genes indicate multiple gene mutations within a line, not gene fusions. Col and Ler in parentheses indicate each line's ecotype background (Col-0 and Ler-1, respectively).

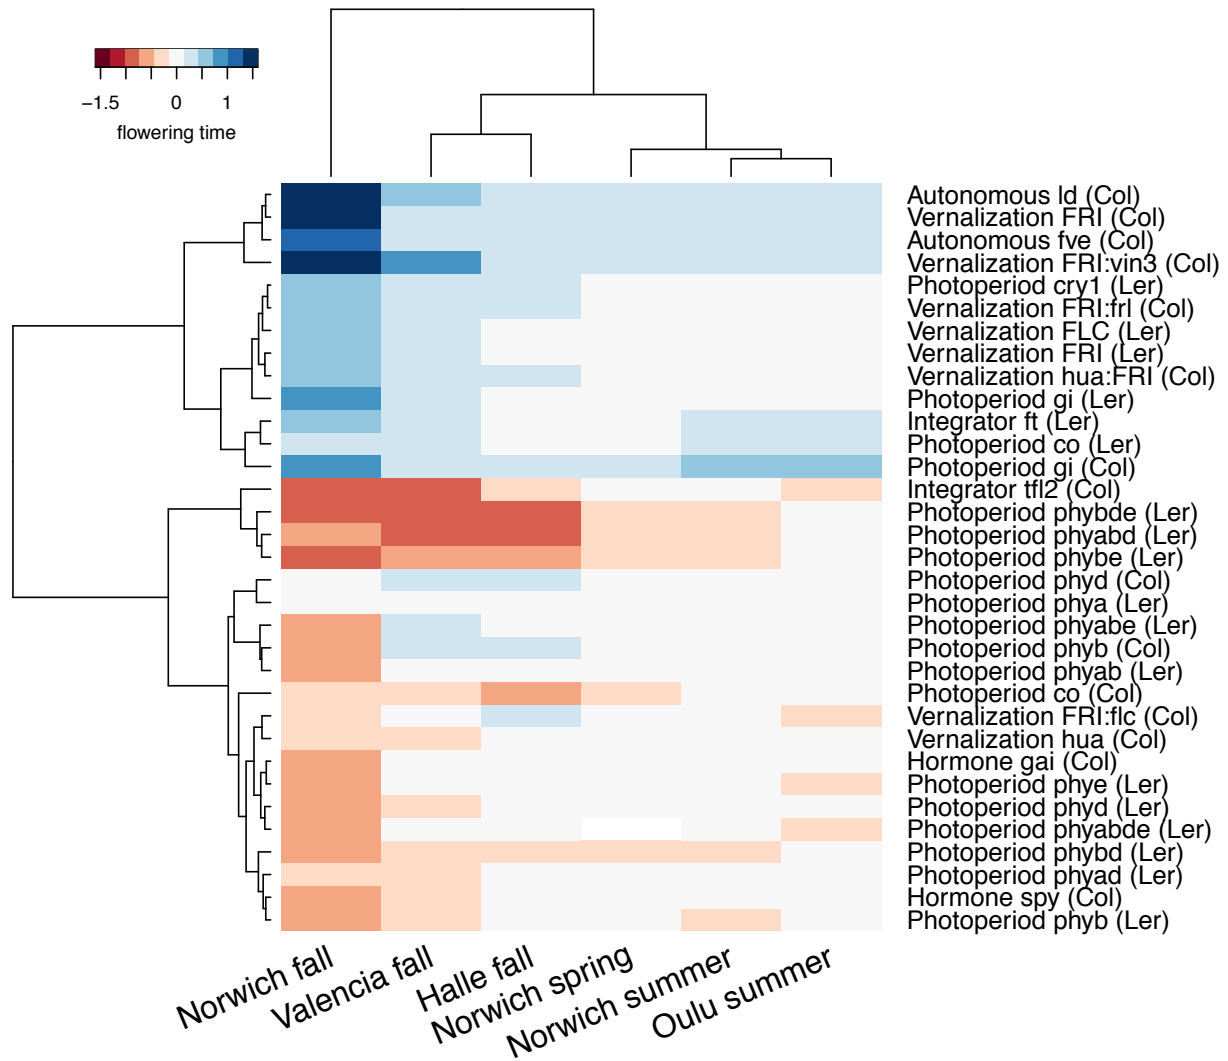

**Fig. S3.** Heatmap of days to flowering in calendar time in *Arabidopsis thaliana* using Euclidian, average-based clustering for both genotype (rows) and planting (columns) relative to ecotype background after  $\log_2$  transformation. Fewer plantings are available for flowering time than bolting time because flowering was measured in fewer sites. The first word of the row identifiers show how lines are classified according to their traditional pathway designation. Subsequent lowercase gene names indicate loss-of-function alleles; uppercase, gain-of-function. Colons between pathways or genes indicate multiple gene mutations within a line, not gene fusions. Col and Ler in parentheses indicate each line's ecotype background (Col-0 and Ler-1, respectively).

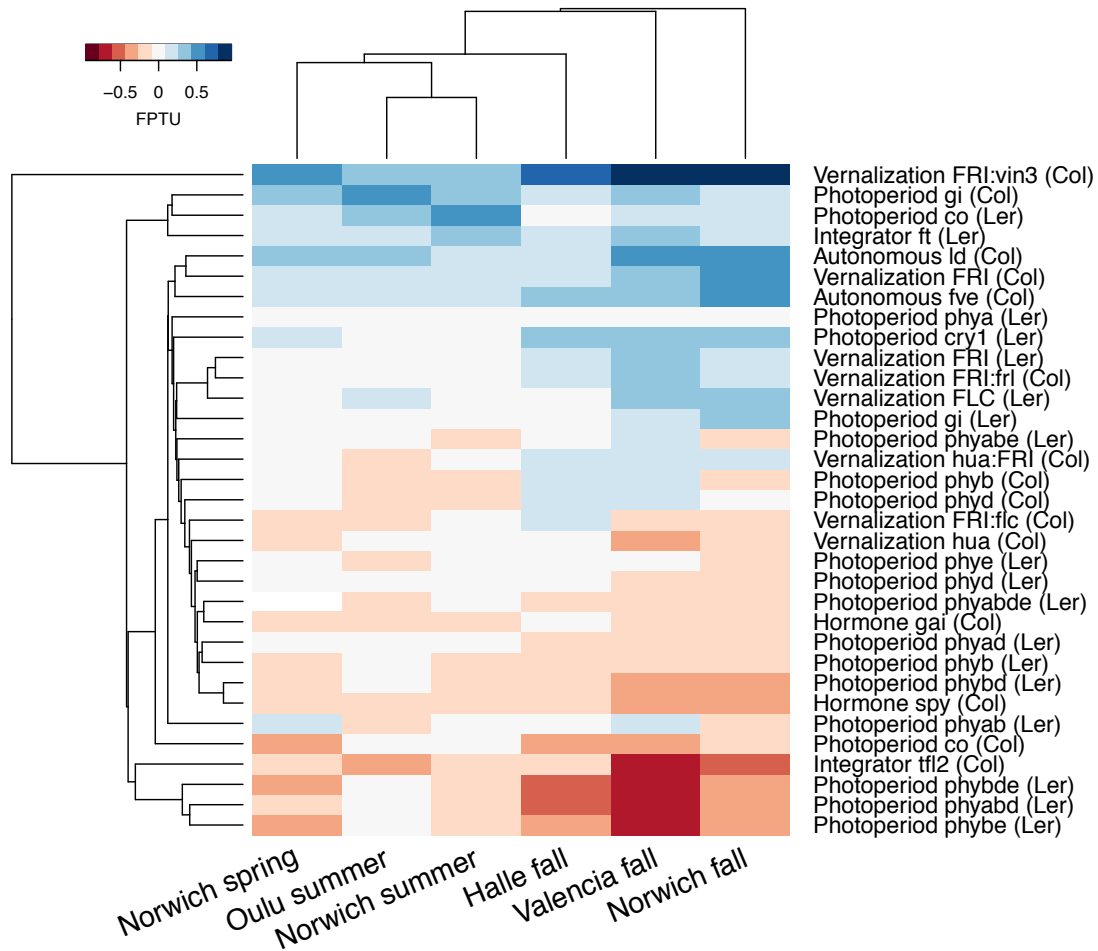

**Fig. S4.** Heatmap of accumulated photothermal units to flowering (FPTU) in *Arabidopsis thaliana* using Euclidian, average-based clustering for both genotype (rows) and planting (columns) relative to ecotype background after  $\log_2$  transformation. Fewer plantings are available for flowering time than bolting time because flowering was measured in fewer sites. The first word of the row identifiers show how lines are classified according to their traditional pathway designation. Subsequent lowercase gene names indicate loss-of-function alleles; uppercase, gain-of-function. Colons between pathways or genes indicate multiple gene mutations within a line, not gene fusions. Col and Ler in parentheses indicate each line's ecotype background (Col-0 and Ler-1, respectively).

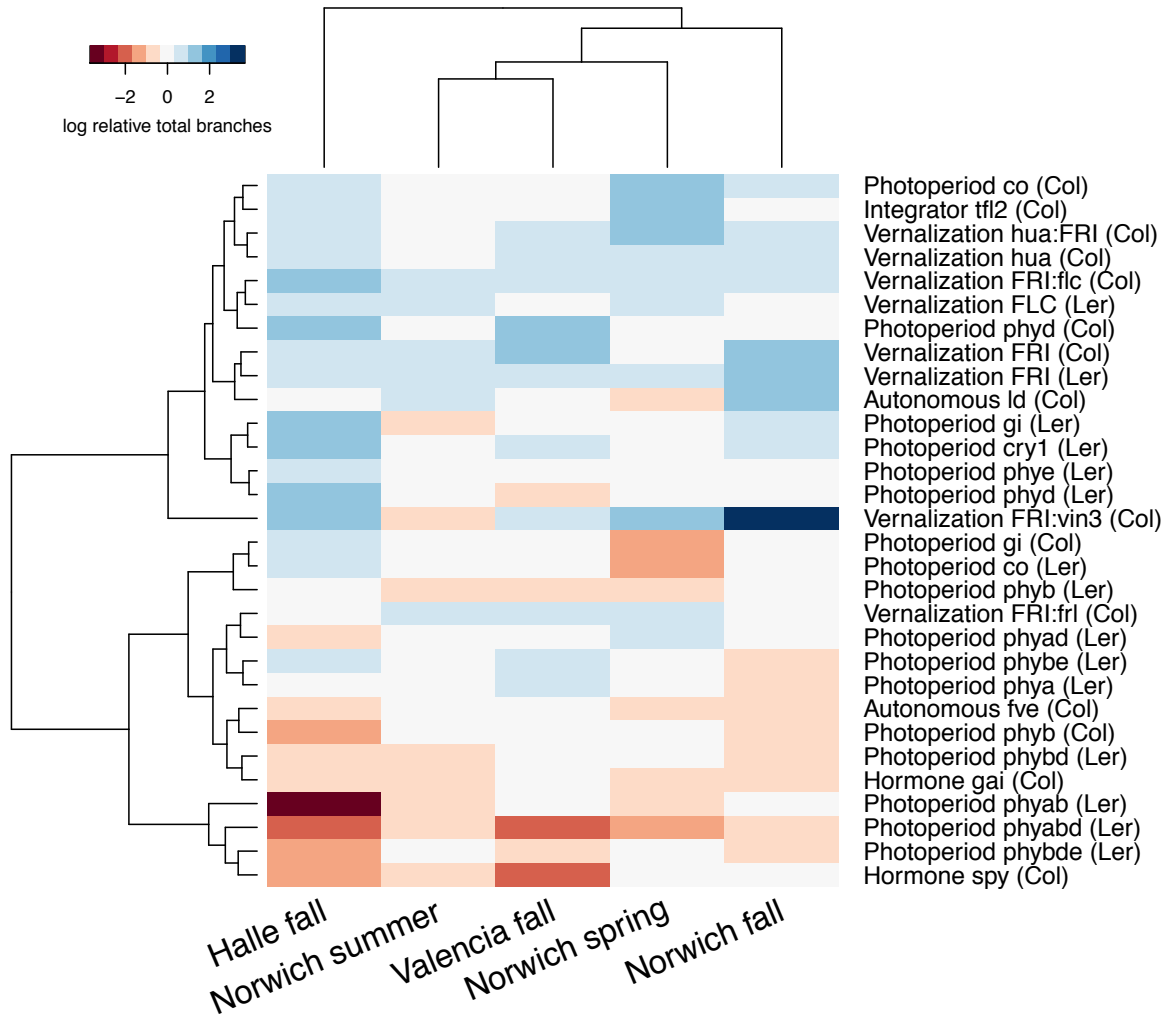

**Fig. S5.** Heatmap of least-square means of branching (total branch number) in mutants relative to ecotype background on a  $\log_2$  scale, centered within plantings, visualizing two-step hierarchical cluster by a Euclidian distance, average-based algorithm for both genotype (rows) and planting (columns). All mutant pathways are represented though not all genotypes since some were not planted in all eight sites and seasons. The first word of the row identifiers show which pathway was manipulated in a mutant, as defined by FLOR-ID (51). Lowercase gene names indicate diminished function alleles, and uppercase, functional. Colons between pathways or genes indicate multiple genetic manipulations within a line, not gene fusions. (Col) and (Ler) in parentheses indicate each line's ecotype background, Col-0 and Ler-1, respectively. Genotypes with an induced mutation combined with a functional FRIGIDA (denoted by "FRI") were relativized against FRI (Col) instead of Col-0.

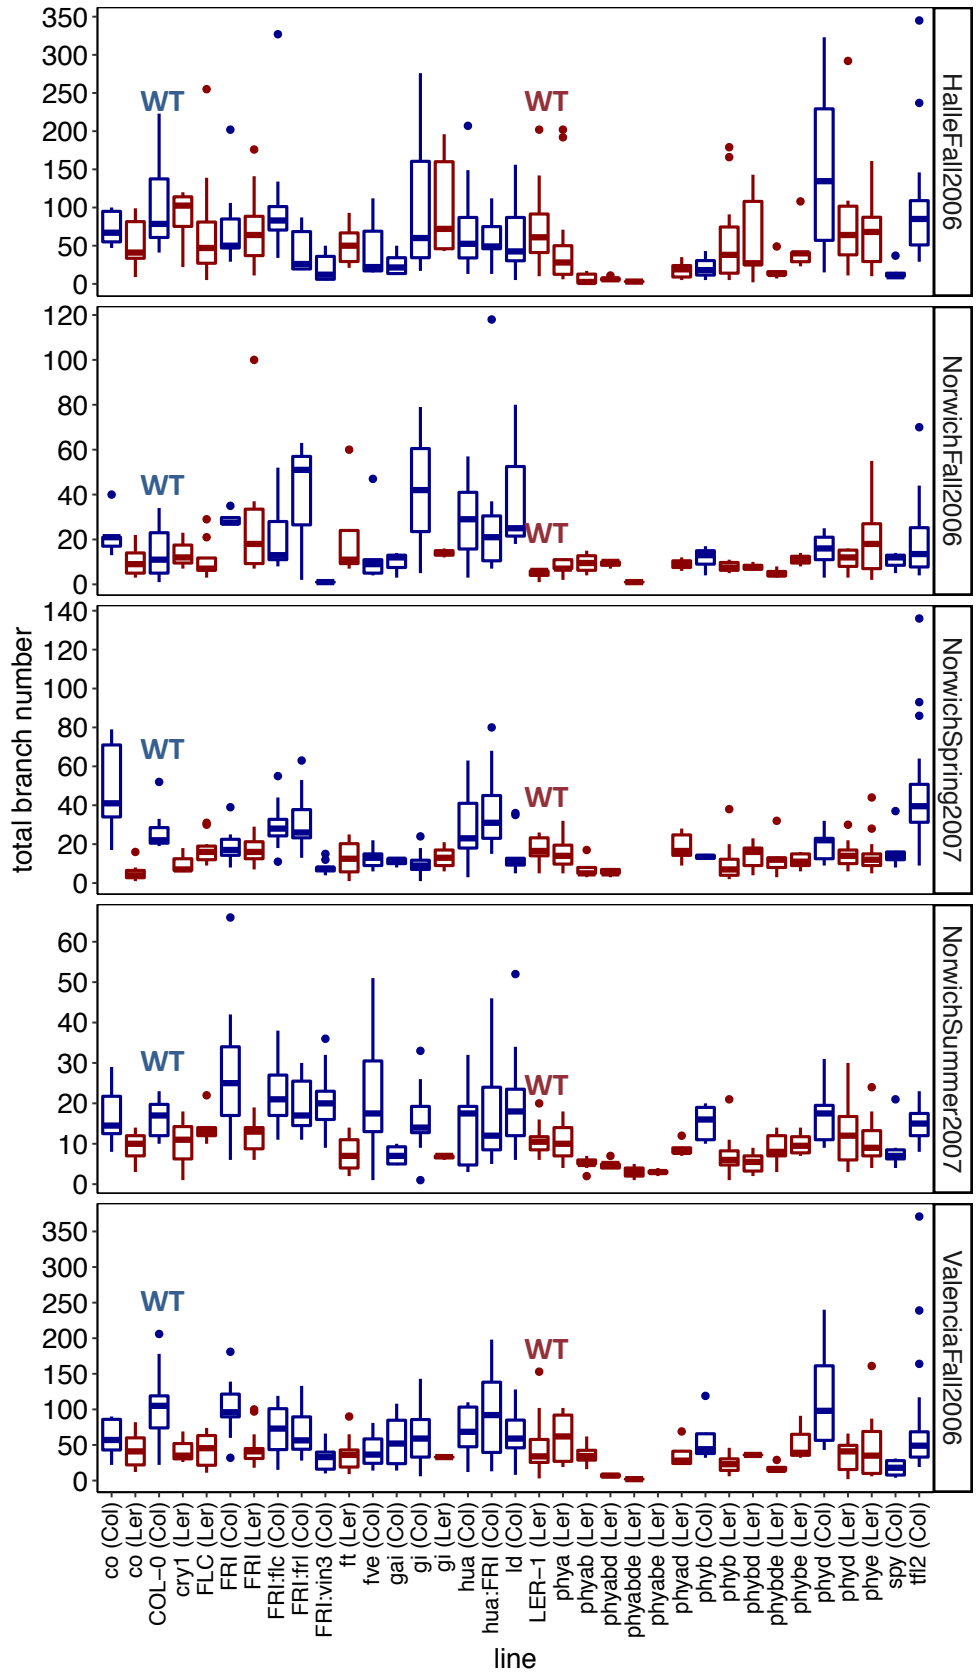

background  
 Col  
 Ler  
 WT Col ecotype background  
 WT Ler ecotype background

**Fig. S6.** Total branch number for all lines in this experiment. Lowercase gene names indicate loss-of-function alleles; uppercase, gain-of-function. Colons between the genes indicate multiple gene mutations within a line, not gene fusions. Col and Ler in parentheses indicate each line's ecotype background (Col-0 and Ler-1, respectively), as well as the boxplot color. "WT" does not represent data but is a label for the Col-0 ecotype background in blue and the Ler-1 ecotype background in red. Boxes represent the 25% and 75% quartiles, and the large dark line in the center of the box represents the median. Whiskers show the highest value within the boxplot range ( $1.5 \times$  Interquartile Range). Points show values that exceed the boxplot range.

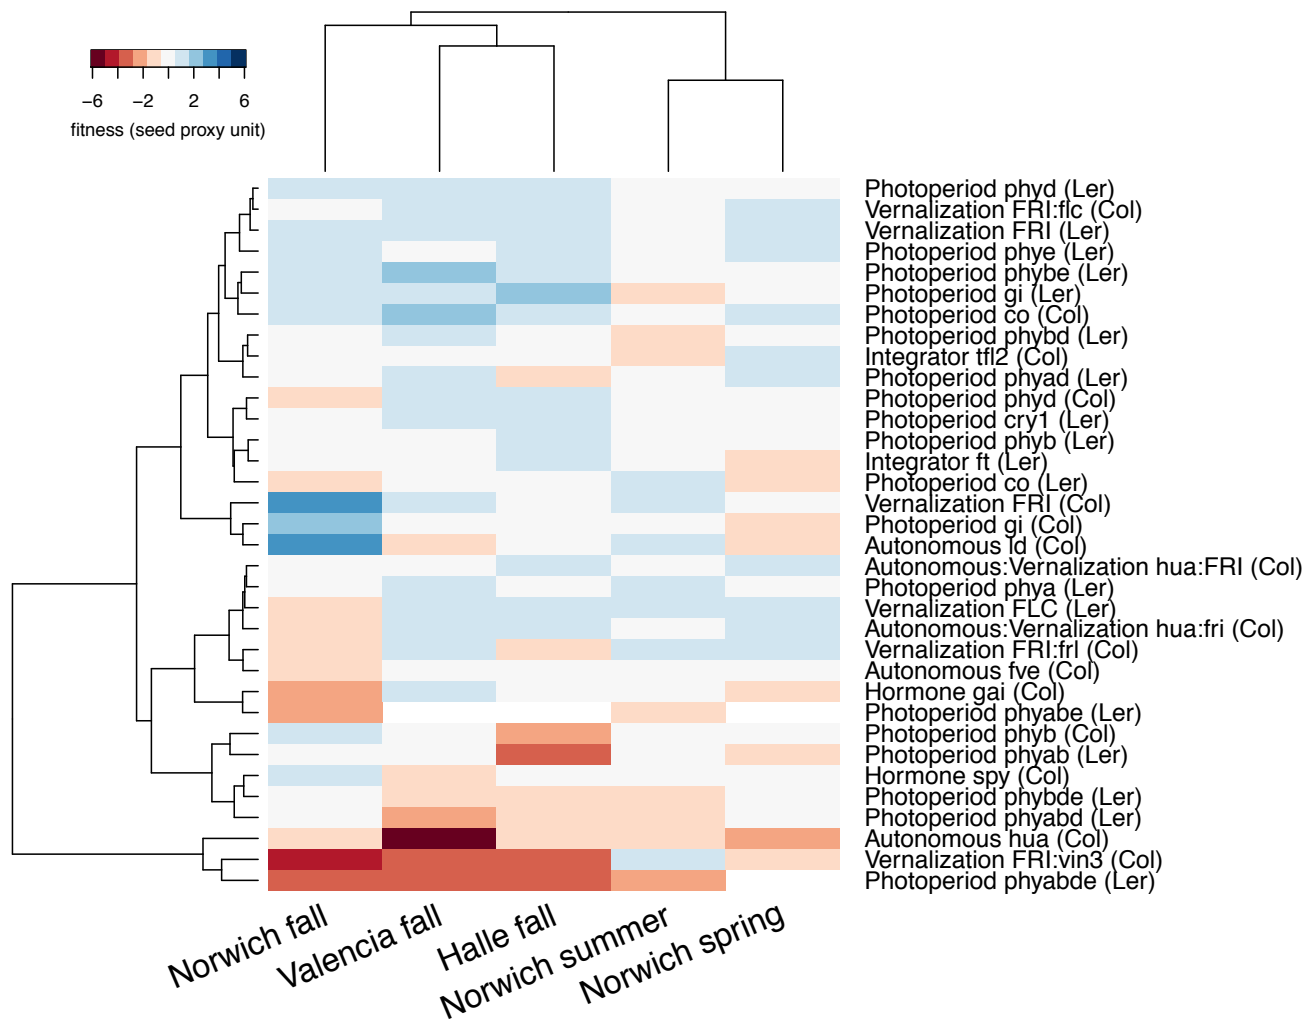

**Fig. S7.** Heatmap of least-square means of accumulated fitness (seed proxy units) in mutants relative to ecotype background on a  $\log_2$  scale, centered within plantings, visualizing two-step hierarchical cluster by a Euclidian distance, average-based algorithm for both genotype (rows) and planting (columns). All mutant pathways are represented though not all genotypes since some were not planted in all eight sites and seasons. The first word of the row identifiers show which pathway was manipulated in a mutant, as defined by FLOR-ID (51). Lowercase gene names indicate diminished function alleles, and uppercase, functional. Colons between pathways or genes indicate multiple genetic manipulations within a line, not gene fusions. (Col) and (Ler) in parentheses indicate each line's ecotype background, Col-0 and Ler-1, respectively. Genotypes with an induced mutation combined with a functional FRIGIDA (denoted by "FRI") were relativized against FRI (Col) instead of Col-0.

| Genotype       | LoF Mutant No. (reference) | DTB   | DTF   | BPTU     | FPTU     | Initial Leaf No. | Leaf Length at Bolting |
|----------------|----------------------------|-------|-------|----------|----------|------------------|------------------------|
| <b>COL-0</b>   | ecotype                    | 58.01 | 64.99 | 7362.99  | 8910.71  | 2.76             | 26.31                  |
| <b>LER-1</b>   | ecotype                    | 49.55 | 66.76 | 6931.42  | 8511.92  | 2.54             | 21.67                  |
| FRI (Col)      | <i>FRI</i> NIL (25)        | 81.05 | 78.00 | 9609.40  | 11204.48 | 2.47             | 28.15                  |
| FRI:flc (Col)  | <i>flc-3</i> (25, 26)      | 57.65 | 65.42 | 7231.59  | 8815.84  | 2.41             | 24.10                  |
| FRI:frl (Col)  | <i>frl1-1</i> (25, 27)     | 70.44 | 70.34 | 8417.04  | 9856.68  | 2.49             | 26.11                  |
| FRI:vin3 (Col) | <i>FRI:vin3-1</i> (11, 25) | 86.05 | 76.83 | 11925.05 | 13274.95 | 2.13             | 27.40                  |
| FRI:hua2(Col)  | <i>hua2-3</i> (25, 28)     | 61.63 | 72.45 | 7832.02  | 9542.94  | 2.43             | 24.99                  |
| FRI (Ler)      | <i>FRI</i> NIL (25)        | 67.60 | 82.28 | 8205.42  | 9798.51  | 2.31             | 27.18                  |
| ft (Ler)       | <i>ft-2</i> (29)           | 69.28 | 84.94 | 8954.64  | 10856.00 | 1.84             | 25.53                  |
| fve (Col)      | <i>fve-4</i> (30)          | 85.07 | 86.18 | 9648.44  | 11262.33 | 1.90             | 27.70                  |
| gai (Col)      | <i>gai-d1</i> (31)         | 51.81 | 64.97 | 7326.88  | 8768.60  | 1.64             | 19.99                  |
| gi (Col)       | <i>gi-2</i> (32)           | 77.45 | 84.51 | 9693.02  | 11909.13 | 2.28             | 28.38                  |
| gi (Ler)       | <i>gi-6</i> (29)           | 60.94 | 81.27 | 7749.28  | 9529.00  | 2.37             | 21.44                  |
| hua2 (Col)     | <i>hua2-3</i> (28)         | 51.93 | 66.76 | 7196.03  | 8850.69  | 2.15             | 20.66                  |
| ld (Col)       | <i>ld-1</i> (33)           | 87.44 | 92.57 | 10044.66 | 11751.54 | 2.10             | 24.29                  |
| spy (Col)      | <i>spy-3</i> (34)          | 48.61 | 62.20 | 6721.40  | 8295.28  | 2.41             | 19.47                  |
| tfl2 (Col)     | <i>tfl2-1</i> (35)         | 38.21 | 53.68 | 6031.25  | 7545.29  | 3.24             | 12.34                  |
| cry1 (Ler)     | <i>hy4-1</i> (36)          | 66.90 | 83.54 | 8239.75  | 10426.44 | 2.16             | 23.46                  |
| co (Col)       | <i>co-1</i> (37)           | 44.63 | 55.40 | 6915.81  | 8352.76  | 2.63             | 21.06                  |
| co (Ler)       | <i>co-2</i> (38)           | 63.25 | 84.25 | 8954.63  | 10871.75 | 2.05             | 23.54                  |
| phya (Ler)     | <i>phya-2</i> (39)         | 52.82 | 69.40 | 7187.43  | 8889.28  | 2.51             | 22.87                  |
| phyb (Ler)     | <i>phyb-1</i> (40)         | 41.87 | 55.86 | 6510.04  | 8282.50  | 2.13             | 18.32                  |
| phyb (Col)     | <i>phyb-9</i> (41)         | 66.94 | 71.80 | 7771.03  | 9204.25  | 2.10             | 20.01                  |
| phyd (Ler)     | <i>phyd-1</i> (42)         | 50.11 | 65.46 | 7029.72  | 8671.19  | 2.40             | 21.06                  |
| phyd (Col)     | <i>phyd-2</i> (42)         | 64.65 | 70.41 | 7682.14  | 9237.55  | 2.30             | 26.09                  |
| phye (Ler)     | <i>phye-1</i> (43)         | 53.77 | 65.77 | 7226.73  | 8697.22  | 2.36             | 21.85                  |
| phyab (Ler)    | <i>phyb-1</i> *            | 50.55 | 65.29 | 7185.64  | 9025.33  | 1.76             | 17.14                  |
| phyabd (Ler)   | <i>b-1/d-1</i> *           | 35.12 | 48.34 | 6064.32  | 7666.51  | 2.47             | 15.95                  |
| phyabde(Ler)   | <i>b-1/d-1</i> *           | 36.38 | 43.89 | 6915.64  | 8582.84  | 1.06             | 14.47                  |
| phyabe (Ler)   | <i>phyb-1</i> *            | 41.04 | 48.63 | 7258.51  | 8942.14  | 1.00             | 14.11                  |
| phyad (Ler)    | <i>phyd-1</i> *            | 45.40 | 60.40 | 6840.53  | 8472.59  | 2.59             | 20.72                  |
| phybd (Ler)    | <i>b-1/d-1</i> *           | 38.59 | 54.83 | 6294.95  | 8090.42  | 2.11             | 16.28                  |
| phybde (Ler)   | <i>b-1/d-1</i> *           | 32.80 | 42.39 | 5803.20  | 7317.59  | 2.03             | 12.79                  |
| phybe (Ler)    | <i>phyb-1</i> *            | 33.81 | 48.17 | 5868.16  | 7528.94  | 2.04             | 13.97                  |

**Table S1** continued next page :



| genotype       | Main Branch No. | Cauline Branch No. | Basal Branch No. | High Order Branch No. | Total Branch No. | Seed Proxy Units |
|----------------|-----------------|--------------------|------------------|-----------------------|------------------|------------------|
| <b>COL-0</b>   | 0.88            | 3.91               | 7.45             | 45.08                 | 53.38            | 8265             |
| cry1 (Ler)     | 1.00            | 6.47               | 2.63             | 28.53                 | 32.16            | 2214             |
| FRI (Ler)      | 0.95            | 5.76               | 5.87             | 32.40                 | 39.23            | 6048             |
| FRI (Col)      | 0.92            | 5.67               | 6.69             | 41.80                 | 49.41            | 5327             |
| FRI:flc (Col)  | 0.84            | 3.97               | 8.19             | 41.81                 | 50.81            | 7224             |
| FRI:frl (Col)  | 0.89            | 5.11               | 5.19             | 32.59                 | 38.67            | 4455             |
| FRI:vin3 (Col) | 0.89            | 3.89               | 3.89             | 14.63                 | 19.42            | 1137             |
| ft (Ler)       | 0.91            | 6.00               | 3.72             | 21.65                 | 26.28            | 2318             |
| fve (Col)      | 0.93            | 5.33               | 4.29             | 23.13                 | 28.35            | 2765             |
| gai (Col)      | 0.83            | 2.38               | 3.33             | 15.83                 | 20.00            | 1935             |
| gi (Col)       | 0.85            | 4.40               | 6.08             | 36.94                 | 43.17            | 3613             |
| gi (Ler)       | 0.89            | 4.50               | 4.78             | 32.67                 | 38.33            | 3983             |
| hua2 (Col)     | 0.77            | 3.37               | 4.83             | 38.18                 | 43.71            | 5966             |
| hua2:FRI (Col) | 0.87            | 4.49               | 5.28             | 43.59                 | 49.74            | 7193             |
| ld (Col)       | 0.77            | 4.48               | 7.44             | 32.00                 | 40.21            | 3286             |
| <b>LER-1</b>   | 0.89            | 4.68               | 5.32             | 30.78                 | 37.00            | 7028             |
| co (Col)       | 0.86            | 3.26               | 6.63             | 33.51                 | 41.00            | 6264             |
| co (Ler)       | 0.87            | 4.29               | 4.21             | 22.02                 | 27.10            | 3073             |
| phya (Ler)     | 0.85            | 3.70               | 4.06             | 18.87                 | 23.78            | 3465             |
| phyab (Ler)    | 0.84            | 2.69               | 1.91             | 8.53                  | 11.28            | 603              |
| phyabd (Ler)   | 0.96            | 2.54               | 0.92             | 4.21                  | 6.08             | 781              |
| phyabde (Ler)  | 1.00            | 1.00               | 0.17             | 1.33                  | 2.50             | 111              |
| phyabe (Ler)   | 1.00            | 2.00               | 0.00             | 2.00                  | 2.40             | 106              |
| phyad (Ler)    | 0.80            | 4.04               | 3.36             | 14.36                 | 18.52            | 2900             |
| phyb (Ler)     | 0.83            | 2.40               | 2.97             | 13.25                 | 17.04            | 2650             |
| phyb (Col)     | 0.91            | 2.91               | 3.30             | 18.00                 | 22.22            | 2061             |
| phybd (Ler)    | 0.89            | 2.54               | 2.07             | 15.75                 | 18.71            | 3349             |
| phybde (Ler)   | 0.68            | 1.03               | 2.87             | 8.58                  | 12.13            | 1145             |
| phybe (Ler)    | 0.79            | 2.25               | 4.25             | 17.96                 | 23.00            | 3096             |
| phyd (Ler)     | 0.86            | 3.87               | 3.71             | 23.77                 | 28.34            | 4095             |
| phyd (Col)     | 0.84            | 3.45               | 6.65             | 40.16                 | 47.65            | 6662             |
| phye (Ler)     | 0.88            | 3.49               | 4.61             | 21.09                 | 26.58            | 4813             |
| spy (Col)      | 0.89            | 2.85               | 2.50             | 11.08                 | 14.07            | 2422             |
| tfl2 (Col)     | 0.68            | 2.57               | 8.91             | 39.52                 | 49.11            | 3878             |

**Table S1** Across-site means for 11 non-fitness traits and 1 fitness trait (seed proxy units) analyzed in this study. (Col) refers to a Columbia-0 background, and (Ler) refers to a Landerburg *ERECTA-1* background. NIL stands for near-isogenic line. Capital letters in genotype names represent functional alleles introgressed from the ecotype Sf-2. \*These mutant numbers are shown only for genes requiring disambiguation because more than

one mutation used in this experiment. DTB stands for days to bolting; DTF stands for days to flowering; BPTU represents accumulated photothermal time to bolting; and FPTU represents accumulated photothermal time to flowering.

|                     | df   | SS     | MS    | F      | p       |
|---------------------|------|--------|-------|--------|---------|
| planting            | 7    | 80.69  | 11.53 | 372.12 | <0.0001 |
| genotype            | 34   | 210.17 | 6.18  | 199.54 | <0.0001 |
| planting × genotype | 236  | 60.46  | 0.26  | 8.27   | <0.0001 |
| Residual            | 4625 | 143.28 | 0.03  |        |         |

**Table S2.** We implemented a linear model in the form:

$$relative\ BPTU_{ij} = \mu + planting_i + genotype_j + block_{i:k} + planting \times genotype_{ij} + \epsilon_{ij}$$

where BPTU refers to photothermal time to bolting; genotype represented mutants lines;  $i$  represents planting;  $j$  represents genotype;  $k$  represents block nested within planting  $i$ ; df is degrees of freedom; SS is sum of squares; MS is mean squares; F is the F-statistic, and p is p-value. Block terms were nested within plantings. From this model, we detected that the relative bolting times of plantings, genotypes, and multifactorial combinations of planting and genotype factor levels differed. We used this model to perform subsequent specific contrasts within genotypes among plantings (Table S3).

| genotype                  | planting       | LS mean | SE    | df  | LCL    | UCL    | group |
|---------------------------|----------------|---------|-------|-----|--------|--------|-------|
| Photoperiod co Col        | Norwich Spring | -0.226  | 0.026 | 328 | -0.277 | -0.174 | a     |
|                           | Koeln Spring   | -0.211  | 0.033 | 328 | -0.276 | -0.147 | ab    |
|                           | Norwich Summer | -0.170  | 0.025 | 328 | -0.220 | -0.120 | ab    |
|                           | Halle Fall     | -0.070  | 0.024 | 328 | -0.117 | -0.024 | bc    |
|                           | Oulu Summer    | 0.009   | 0.020 | 328 | -0.030 | 0.048  | cd    |
|                           | Koeln Fall     | 0.043   | 0.027 | 328 | -0.010 | 0.096  | cd    |
|                           | Valencia Fall  | 0.113   | 0.025 | 328 | 0.063  | 0.162  | de    |
|                           | Norwich Fall   | 0.230   | 0.028 | 328 | 0.176  | 0.284  | e     |
| Photoperiod co Ler        | Norwich Spring | -0.021  | 0.025 | 301 | -0.071 | 0.029  | a     |
|                           | Koeln Spring   | 0.002   | 0.038 | 301 | -0.072 | 0.076  | abc   |
|                           | Halle Fall     | 0.020   | 0.022 | 301 | -0.023 | 0.064  | ab    |
|                           | Norwich Summer | 0.026   | 0.025 | 301 | -0.024 | 0.076  | ab    |
|                           | Koeln Fall     | 0.133   | 0.026 | 301 | 0.082  | 0.185  | bc    |
|                           | Oulu Summer    | 0.161   | 0.019 | 301 | 0.125  | 0.198  | c     |
|                           | Valencia Fall  | 0.283   | 0.023 | 301 | 0.238  | 0.328  | d     |
|                           | Norwich Fall   | 0.329   | 0.025 | 301 | 0.280  | 0.378  | d     |
| Photoperiod cry1 Ler      | Norwich Summer | -0.124  | 0.026 | 299 | -0.176 | -0.073 | a     |
|                           | Koeln Spring   | -0.104  | 0.038 | 299 | -0.180 | -0.028 | a     |
|                           | Norwich Spring | -0.057  | 0.033 | 299 | -0.123 | 0.008  | ab    |
|                           | Oulu Summer    | 0.000   | 0.020 | 299 | -0.039 | 0.039  | ab    |
|                           | Halle Fall     | 0.102   | 0.025 | 299 | 0.054  | 0.150  | bc    |
|                           | Koeln Fall     | 0.182   | 0.031 | 299 | 0.121  | 0.243  | cd    |
|                           | Valencia Fall  | 0.296   | 0.025 | 299 | 0.247  | 0.346  | d     |
|                           | Norwich Fall   | 0.355   | 0.029 | 299 | 0.298  | 0.413  | d     |
| Vernalization FLC Ler     | Norwich Summer | -0.107  | 0.026 | 316 | -0.159 | -0.055 | a     |
|                           | Koeln Spring   | -0.092  | 0.033 | 316 | -0.157 | -0.028 | ab    |
|                           | Norwich Spring | -0.063  | 0.026 | 316 | -0.115 | -0.012 | ab    |
|                           | Halle Fall     | 0.035   | 0.023 | 316 | -0.010 | 0.080  | bc    |
|                           | Oulu Summer    | 0.074   | 0.020 | 316 | 0.035  | 0.113  | c     |
|                           | Koeln Fall     | 0.178   | 0.028 | 316 | 0.123  | 0.234  | c     |
|                           | Valencia Fall  | 0.334   | 0.024 | 316 | 0.286  | 0.382  | d     |
|                           | Norwich Fall   | 0.389   | 0.027 | 316 | 0.336  | 0.441  | d     |
| Vernalization FRI Ler     | Koeln Spring   | -0.102  | 0.031 | 312 | -0.163 | -0.041 | a     |
|                           | Norwich Summer | -0.094  | 0.024 | 312 | -0.141 | -0.047 | a     |
|                           | Norwich Spring | -0.071  | 0.025 | 312 | -0.121 | -0.022 | ab    |
|                           | Oulu Summer    | 0.021   | 0.020 | 312 | -0.018 | 0.060  | ab    |
|                           | Halle Fall     | 0.052   | 0.022 | 312 | 0.010  | 0.095  | bc    |
|                           | Koeln Fall     | 0.174   | 0.025 | 312 | 0.124  | 0.223  | c     |
|                           | Valencia Fall  | 0.331   | 0.023 | 312 | 0.285  | 0.376  | d     |
|                           | Norwich Fall   | 0.354   | 0.026 | 312 | 0.303  | 0.405  | d     |
| Vernalization FRI Col     | Koeln Spring   | -0.058  | 0.033 | 310 | -0.123 | 0.007  | a     |
|                           | Norwich Summer | -0.048  | 0.024 | 310 | -0.096 | 0.000  | a     |
|                           | Norwich Spring | -0.026  | 0.025 | 310 | -0.075 | 0.023  | a     |
|                           | Halle Fall     | 0.068   | 0.023 | 310 | 0.023  | 0.112  | ab    |
|                           | Oulu Summer    | 0.119   | 0.019 | 310 | 0.081  | 0.157  | bc    |
|                           | Koeln Fall     | 0.235   | 0.027 | 310 | 0.181  | 0.289  | cd    |
|                           | Valencia Fall  | 0.326   | 0.024 | 310 | 0.279  | 0.374  | de    |
|                           | Norwich Fall   | 0.463   | 0.029 | 310 | 0.405  | 0.520  | e     |
| Vernalization FRI:frl Col | Norwich Summer | -0.175  | 0.025 | 323 | -0.224 | -0.127 | a     |

|                            |                |        |       |     |        |        |     |
|----------------------------|----------------|--------|-------|-----|--------|--------|-----|
|                            | Koeln Spring   | -0.115 | 0.032 | 323 | -0.178 | -0.053 | ab  |
|                            | Norwich Spring | -0.080 | 0.026 | 323 | -0.130 | -0.030 | ab  |
|                            | Oulu Summer    | -0.003 | 0.019 | 323 | -0.040 | 0.035  | bc  |
|                            | Halle Fall     | 0.065  | 0.024 | 323 | 0.019  | 0.111  | c   |
|                            | Koeln Fall     | 0.211  | 0.026 | 323 | 0.160  | 0.262  | d   |
|                            | Valencia Fall  | 0.309  | 0.024 | 323 | 0.261  | 0.357  | d   |
|                            | Norwich Fall   | 0.355  | 0.027 | 323 | 0.301  | 0.409  | d   |
| Vernalization FRI:vin3 Col | Norwich Summer | -0.023 | 0.026 | 295 | -0.074 | 0.027  | a   |
|                            | Koeln Spring   | 0.043  | 0.031 | 295 | -0.018 | 0.104  | ab  |
|                            | Norwich Spring | 0.123  | 0.028 | 295 | 0.069  | 0.177  | abc |
|                            | Oulu Summer    | 0.136  | 0.020 | 295 | 0.098  | 0.175  | b   |
|                            | Halle Fall     | 0.293  | 0.027 | 295 | 0.239  | 0.346  | d   |
|                            | Koeln Fall     | 0.295  | 0.033 | 295 | 0.230  | 0.360  | cd  |
|                            | Norwich Fall   | 0.545  | 0.044 | 295 | 0.458  | 0.633  | e   |
| Integrator ft Ler          | Norwich Summer | -0.016 | 0.026 | 308 | -0.068 | 0.036  | a   |
|                            | Norwich Spring | -0.014 | 0.026 | 308 | -0.066 | 0.038  | a   |
|                            | Koeln Spring   | 0.011  | 0.033 | 308 | -0.053 | 0.075  | ab  |
|                            | Halle Fall     | 0.035  | 0.023 | 308 | -0.010 | 0.079  | ab  |
|                            | Oulu Summer    | 0.109  | 0.019 | 308 | 0.072  | 0.146  | ab  |
|                            | Koeln Fall     | 0.165  | 0.026 | 308 | 0.114  | 0.215  | b   |
|                            | Norwich Fall   | 0.365  | 0.027 | 308 | 0.312  | 0.418  | c   |
| Autonomous fve Col         | Norwich Summer | -0.080 | 0.026 | 316 | -0.131 | -0.029 | a   |
|                            | Norwich Spring | -0.028 | 0.026 | 316 | -0.078 | 0.023  | ab  |
|                            | Koeln Spring   | -0.019 | 0.030 | 316 | -0.078 | 0.040  | abc |
|                            | Halle Fall     | 0.076  | 0.023 | 316 | 0.031  | 0.121  | bc  |
|                            | Oulu Summer    | 0.108  | 0.020 | 316 | 0.069  | 0.146  | cd  |
|                            | Koeln Fall     | 0.236  | 0.027 | 316 | 0.182  | 0.289  | de  |
|                            | Norwich Fall   | 0.423  | 0.028 | 316 | 0.368  | 0.478  | f   |
| Hormone gai Col            | Norwich Summer | -0.168 | 0.027 | 292 | -0.220 | -0.116 | a   |
|                            | Koeln Spring   | -0.163 | 0.060 | 292 | -0.280 | -0.045 | abc |
|                            | Norwich Spring | -0.136 | 0.032 | 292 | -0.199 | -0.073 | ab  |
|                            | Oulu Summer    | -0.065 | 0.019 | 292 | -0.103 | -0.027 | ab  |
|                            | Halle Fall     | 0.004  | 0.024 | 292 | -0.043 | 0.051  | bc  |
|                            | Koeln Fall     | 0.088  | 0.029 | 292 | 0.030  | 0.145  | cd  |
|                            | Norwich Fall   | 0.220  | 0.026 | 292 | 0.169  | 0.270  | d   |
| Photoperiod gi Ler         | Norwich Summer | -0.170 | 0.026 | 313 | -0.220 | -0.120 | a   |
|                            | Koeln Spring   | -0.140 | 0.031 | 313 | -0.200 | -0.080 | a   |
|                            | Norwich Spring | -0.072 | 0.025 | 313 | -0.120 | -0.023 | ab  |
|                            | Oulu Summer    | 0.010  | 0.019 | 313 | -0.027 | 0.047  | bc  |
|                            | Halle Fall     | 0.019  | 0.022 | 313 | -0.024 | 0.062  | bc  |
|                            | Koeln Fall     | 0.140  | 0.026 | 313 | 0.089  | 0.191  | cd  |
|                            | Norwich Fall   | 0.387  | 0.027 | 313 | 0.334  | 0.440  | e   |
| Photoperiod gi Col         | Koeln Spring   | -0.011 | 0.029 | 320 | -0.069 | 0.046  | a   |
|                            | Norwich Summer | 0.003  | 0.024 | 320 | -0.045 | 0.051  | a   |
|                            | Norwich Spring | 0.015  | 0.024 | 320 | -0.033 | 0.062  | a   |

|                         |                |        |       |     |        |        |     |
|-------------------------|----------------|--------|-------|-----|--------|--------|-----|
|                         | Halle Fall     | 0.049  | 0.021 | 320 | 0.006  | 0.091  | ab  |
|                         | Oulu Summer    | 0.154  | 0.018 | 320 | 0.118  | 0.189  | b   |
|                         | Koeln Fall     | 0.178  | 0.025 | 320 | 0.129  | 0.227  | b   |
|                         | Valencia Fall  | 0.315  | 0.023 | 320 | 0.270  | 0.359  | c   |
|                         | Norwich Fall   | 0.381  | 0.026 | 320 | 0.331  | 0.432  | c   |
| Vernalization hua Col   | Norwich Summer | -0.191 | 0.026 | 413 | -0.242 | -0.139 | a   |
|                         | Norwich Spring | -0.155 | 0.027 | 413 | -0.208 | -0.101 | ab  |
|                         | Koeln Spring   | -0.149 | 0.037 | 413 | -0.222 | -0.077 | abc |
|                         | Oulu Summer    | -0.043 | 0.020 | 413 | -0.082 | -0.004 | bcd |
|                         | Halle Fall     | 0.008  | 0.024 | 413 | -0.039 | 0.055  | cde |
|                         | Koeln Fall     | 0.094  | 0.028 | 413 | 0.039  | 0.149  | def |
|                         | Valencia Fall  | 0.127  | 0.026 | 413 | 0.076  | 0.178  | ef  |
|                         | Norwich Fall   | 0.221  | 0.027 | 413 | 0.167  | 0.275  | f   |
| Autonomous Id Col       | Norwich Summer | -0.042 | 0.025 | 308 | -0.092 | 0.007  | a   |
|                         | Koeln Spring   | -0.025 | 0.031 | 308 | -0.086 | 0.036  | a   |
|                         | Norwich Spring | 0.017  | 0.027 | 308 | -0.035 | 0.070  | a   |
|                         | Halle Fall     | 0.066  | 0.023 | 308 | 0.021  | 0.110  | ab  |
|                         | Oulu Summer    | 0.151  | 0.019 | 308 | 0.113  | 0.189  | b   |
|                         | Koeln Fall     | 0.205  | 0.026 | 308 | 0.154  | 0.257  | b   |
|                         | Valencia Fall  | 0.392  | 0.024 | 308 | 0.346  | 0.439  | c   |
|                         | Norwich Fall   | 0.460  | 0.030 | 308 | 0.400  | 0.519  | c   |
| Photoperiod phya Ler    | Norwich Summer | -0.204 | 0.024 | 542 | -0.251 | -0.157 | a   |
|                         | Koeln Spring   | -0.130 | 0.031 | 542 | -0.191 | -0.070 | ab  |
|                         | Norwich Spring | -0.091 | 0.025 | 542 | -0.139 | -0.042 | ab  |
|                         | Oulu Summer    | -0.027 | 0.018 | 542 | -0.063 | 0.009  | b   |
|                         | Halle Fall     | 0.021  | 0.022 | 542 | -0.022 | 0.063  | bc  |
|                         | Koeln Fall     | 0.116  | 0.025 | 542 | 0.066  | 0.166  | cd  |
|                         | Valencia Fall  | 0.212  | 0.023 | 542 | 0.166  | 0.258  | de  |
|                         | Norwich Fall   | 0.268  | 0.025 | 542 | 0.218  | 0.318  | e   |
| Photoperiod phyabd Ler  | Norwich Summer | -0.227 | 0.026 | 316 | -0.278 | -0.176 | a   |
|                         | Norwich Spring | -0.182 | 0.027 | 316 | -0.236 | -0.129 | ab  |
|                         | Koeln Spring   | -0.160 | 0.034 | 316 | -0.227 | -0.093 | abc |
|                         | Halle Fall     | -0.106 | 0.024 | 316 | -0.153 | -0.060 | abc |
|                         | Koeln Fall     | -0.034 | 0.028 | 316 | -0.088 | 0.021  | bc  |
|                         | Oulu Summer    | -0.031 | 0.020 | 316 | -0.071 | 0.009  | c   |
|                         | Valencia Fall  | 0.017  | 0.028 | 316 | -0.037 | 0.072  | c   |
|                         | Norwich Fall   | 0.185  | 0.028 | 316 | 0.131  | 0.240  | d   |
| Photoperiod phyabde Ler | Norwich Summer | -0.177 | 0.028 | 249 | -0.232 | -0.122 | a   |
|                         | Koeln Spring   | -0.153 | 0.064 | 249 | -0.280 | -0.027 | ab  |
|                         | Oulu Summer    | -0.038 | 0.022 | 249 | -0.082 | 0.006  | ab  |
|                         | Halle Fall     | 0.031  | 0.039 | 249 | -0.046 | 0.108  | bc  |
|                         | Koeln Fall     | 0.065  | 0.041 | 249 | -0.016 | 0.146  | bc  |
|                         | Valencia Fall  | 0.208  | 0.036 | 249 | 0.137  | 0.279  | c   |
|                         | Norwich Fall   | 0.256  | 0.063 | 249 | 0.133  | 0.379  | c   |
|                         | Norwich Spring | NA     | NA    | NA  | NA     | NA     |     |
| Photoperiod phyad Ler   | Norwich Summer | -0.214 | 0.029 | 327 | -0.270 | -0.157 | a   |
|                         | Norwich Spring | -0.126 | 0.029 | 327 | -0.183 | -0.070 | ab  |
|                         | Koeln Spring   | -0.124 | 0.036 | 327 | -0.194 | -0.054 | abc |
|                         | Oulu Summer    | -0.022 | 0.021 | 327 | -0.064 | 0.020  | bc  |
|                         | Halle Fall     | -0.017 | 0.026 | 327 | -0.068 | 0.033  | bc  |

|                        |                |        |       |     |        |        |    |
|------------------------|----------------|--------|-------|-----|--------|--------|----|
|                        | Koeln Fall     | 0.052  | 0.030 | 327 | -0.007 | 0.110  | cd |
|                        | Valencia Fall  | 0.136  | 0.026 | 327 | 0.084  | 0.189  | de |
|                        | Norwich Fall   | 0.255  | 0.030 | 327 | 0.197  | 0.313  | e  |
| Photoperiod phyb Ler   | Norwich Summer | -0.228 | 0.026 | 607 | -0.278 | -0.177 | a  |
|                        | Koeln Spring   | -0.169 | 0.034 | 607 | -0.235 | -0.103 | ab |
|                        | Norwich Spring | -0.162 | 0.027 | 607 | -0.214 | -0.110 | ab |
|                        | Oulu Summer    | -0.042 | 0.020 | 607 | -0.081 | -0.004 | bc |
|                        | Halle Fall     | -0.036 | 0.024 | 607 | -0.083 | 0.010  | bc |
|                        | Koeln Fall     | 0.030  | 0.028 | 607 | -0.024 | 0.084  | cd |
|                        | Valencia Fall  | 0.124  | 0.026 | 607 | 0.074  | 0.174  | de |
|                        | Norwich Fall   | 0.221  | 0.027 | 607 | 0.167  | 0.274  | e  |
|                        | Norwich Summer | -0.270 | 0.024 | 312 | -0.318 | -0.222 | a  |
| Photoperiod phybd Ler  | Koeln Spring   | -0.228 | 0.041 | 309 | -0.310 | -0.147 | ab |
|                        | Norwich Summer | -0.226 | 0.028 | 309 | -0.281 | -0.171 | a  |
|                        | Norwich Spring | -0.206 | 0.029 | 309 | -0.263 | -0.149 | ab |
|                        | Halle Fall     | -0.059 | 0.026 | 309 | -0.111 | -0.008 | bc |
|                        | Oulu Summer    | -0.026 | 0.022 | 309 | -0.069 | 0.018  | c  |
|                        | Koeln Fall     | 0.008  | 0.030 | 309 | -0.051 | 0.067  | c  |
|                        | Valencia Fall  | 0.092  | 0.030 | 309 | 0.034  | 0.151  | cd |
|                        | Norwich Fall   | 0.188  | 0.029 | 309 | 0.130  | 0.245  | d  |
| Photoperiod phybde Ler | Koeln Spring   | -0.258 | 0.037 | 310 | -0.330 | -0.185 | ab |
|                        | Norwich Spring | -0.247 | 0.026 | 310 | -0.298 | -0.195 | a  |
|                        | Norwich Summer | -0.246 | 0.025 | 310 | -0.294 | -0.197 | a  |
|                        | Halle Fall     | -0.102 | 0.023 | 310 | -0.148 | -0.057 | bc |
|                        | Koeln Fall     | -0.066 | 0.027 | 310 | -0.118 | -0.014 | c  |
|                        | Oulu Summer    | -0.034 | 0.020 | 310 | -0.072 | 0.005  | c  |
|                        | Valencia Fall  | -0.017 | 0.027 | 310 | -0.070 | 0.037  | c  |
|                        | Norwich Fall   | 0.159  | 0.026 | 310 | 0.108  | 0.211  | d  |
| Photoperiod phybe Ler  | Koeln Spring   | -0.233 | 0.034 | 311 | -0.301 | -0.166 | a  |
|                        | Norwich Summer | -0.226 | 0.025 | 311 | -0.274 | -0.177 | a  |
|                        | Norwich Spring | -0.216 | 0.026 | 311 | -0.267 | -0.164 | a  |
|                        | Halle Fall     | -0.096 | 0.022 | 311 | -0.140 | -0.052 | ab |
|                        | Oulu Summer    | -0.046 | 0.019 | 311 | -0.083 | -0.008 | b  |
|                        | Koeln Fall     | -0.041 | 0.026 | 311 | -0.092 | 0.011  | b  |
|                        | Valencia Fall  | -0.013 | 0.026 | 311 | -0.064 | 0.037  | b  |
|                        | Norwich Fall   | 0.171  | 0.027 | 311 | 0.118  | 0.223  | c  |
| Photoperiod phyd Ler   | Norwich Summer | -0.194 | 0.026 | 540 | -0.245 | -0.143 | a  |
|                        | Koeln Spring   | -0.141 | 0.033 | 540 | -0.205 | -0.077 | ab |
|                        | Norwich Spring | -0.108 | 0.027 | 540 | -0.160 | -0.055 | ab |
|                        | Oulu Summer    | -0.014 | 0.020 | 540 | -0.053 | 0.025  | bc |
|                        | Halle Fall     | 0.019  | 0.024 | 540 | -0.027 | 0.066  | bc |
|                        | Koeln Fall     | 0.088  | 0.028 | 540 | 0.033  | 0.142  | cd |
|                        | Valencia Fall  | 0.176  | 0.025 | 540 | 0.127  | 0.226  | d  |
|                        | Norwich Fall   | 0.226  | 0.028 | 540 | 0.172  | 0.280  | d  |
| Photoperiod phye Ler   | Norwich Summer | -0.194 | 0.026 | 553 | -0.245 | -0.143 | a  |
|                        | Koeln Spring   | -0.130 | 0.033 | 553 | -0.196 | -0.065 | ab |
|                        | Norwich Spring | -0.110 | 0.027 | 553 | -0.163 | -0.057 | ab |
|                        | Oulu Summer    | -0.028 | 0.020 | 553 | -0.067 | 0.011  | b  |
|                        | Halle Fall     | 0.032  | 0.024 | 553 | -0.015 | 0.078  | bc |
|                        | Koeln Fall     | 0.126  | 0.028 | 553 | 0.071  | 0.180  | cd |

|                             |                |        |       |     |        |        |     |
|-----------------------------|----------------|--------|-------|-----|--------|--------|-----|
|                             | Norwich Fall   | 0.227  | 0.028 | 553 | 0.172  | 0.281  | d   |
|                             | Valencia Fall  | 0.234  | 0.025 | 553 | 0.185  | 0.284  | d   |
| Hormone spy Col             | Norwich Summer | -0.258 | 0.026 | 322 | -0.310 | -0.207 | a   |
|                             | Koeln Spring   | -0.218 | 0.035 | 322 | -0.286 | -0.150 | a   |
|                             | Norwich Spring | -0.178 | 0.028 | 322 | -0.232 | -0.123 | ab  |
|                             | Oulu Summer    | -0.044 | 0.021 | 322 | -0.085 | -0.003 | bc  |
|                             | Halle Fall     | -0.032 | 0.024 | 322 | -0.079 | 0.015  | bc  |
|                             | Koeln Fall     | 0.062  | 0.028 | 322 | 0.007  | 0.117  | cd  |
|                             | Valencia Fall  | 0.128  | 0.026 | 322 | 0.077  | 0.178  | d   |
|                             | Norwich Fall   | 0.175  | 0.029 | 322 | 0.119  | 0.232  | d   |
| Integrator tf12 Col         | Norwich Summer | -0.244 | 0.025 | 526 | -0.294 | -0.194 | a   |
|                             | Koeln Spring   | -0.227 | 0.034 | 526 | -0.293 | -0.161 | ab  |
|                             | Norwich Spring | -0.194 | 0.026 | 526 | -0.246 | -0.142 | ab  |
|                             | Oulu Summer    | -0.118 | 0.019 | 526 | -0.156 | -0.080 | abc |
|                             | Koeln Fall     | -0.070 | 0.027 | 526 | -0.123 | -0.017 | bc  |
|                             | Halle Fall     | -0.039 | 0.023 | 526 | -0.085 | 0.006  | c   |
|                             | Valencia Fall  | -0.038 | 0.025 | 526 | -0.086 | 0.011  | c   |
|                             | Norwich Fall   | 0.118  | 0.027 | 526 | 0.066  | 0.171  | d   |
| Photoperiod phyb (Ler)      | Norwich Summer | -0.132 | 0.028 | 244 | -0.187 | -0.076 | a   |
|                             | Cologne Spring | -0.050 | 0.056 | 244 | -0.160 | 0.059  | ab  |
|                             | Oulu Summer    | -0.020 | 0.021 | 244 | -0.061 | 0.022  | ab  |
|                             | Norwich Spring | 0.019  | 0.034 | 244 | -0.047 | 0.086  | ab  |
|                             | Cologne Fall   | 0.024  | 0.032 | 244 | -0.040 | 0.087  | b   |
|                             | Halle Fall     | 0.045  | 0.026 | 244 | -0.007 | 0.096  | b   |
|                             | Norwich Fall   | 0.230  | 0.035 | 244 | 0.161  | 0.298  | c   |
|                             | Valencia Fall  | 0.363  | 0.039 | 244 | 0.286  | 0.439  | c   |
| Photoperiod phybe (Ler)     | Norwich Summer | -0.177 | 0.035 | 146 | -0.247 | -0.107 | a   |
|                             | Norwich Spring | -0.021 | 0.091 | 146 | -0.201 | 0.158  | ab  |
|                             | Halle Fall     | -0.011 | 0.049 | 146 | -0.108 | 0.085  | ab  |
|                             | Cologne Fall   | 0.045  | 0.043 | 146 | -0.040 | 0.131  | b   |
|                             | Oulu Summer    | 0.047  | 0.027 | 146 | -0.006 | 0.101  | b   |
|                             | Norwich Fall   | 0.176  | 0.068 | 146 | 0.042  | 0.309  | bc  |
|                             | Valencia Fall  | 0.363  | 0.050 | 146 | 0.264  | 0.461  | c   |
| Photoperiod phyb (Col)      | Norwich Summer | -0.332 | 0.029 | 207 | -0.390 | -0.275 | a   |
|                             | Cologne Spring | -0.199 | 0.042 | 207 | -0.282 | -0.115 | ab  |
|                             | Norwich Spring | -0.108 | 0.032 | 207 | -0.170 | -0.046 | b   |
|                             | Oulu Summer    | -0.060 | 0.023 | 207 | -0.105 | -0.015 | b   |
|                             | Halle Fall     | 0.099  | 0.028 | 207 | 0.045  | 0.154  | c   |
|                             | Norwich Fall   | 0.200  | 0.029 | 207 | 0.144  | 0.257  | cd  |
|                             | Cologne Fall   | 0.271  | 0.029 | 207 | 0.215  | 0.328  | d   |
|                             | Valencia Fall  | 0.329  | 0.028 | 207 | 0.273  | 0.384  | d   |
| Photoperiod phyd (Col)      | Norwich Summer | -0.251 | 0.033 | 226 | -0.316 | -0.186 | a   |
|                             | Cologne Spring | -0.193 | 0.042 | 226 | -0.276 | -0.110 | ab  |
|                             | Norwich Spring | -0.118 | 0.034 | 226 | -0.184 | -0.052 | ab  |
|                             | Oulu Summer    | -0.071 | 0.026 | 226 | -0.121 | -0.020 | b   |
|                             | Halle Fall     | 0.073  | 0.029 | 226 | 0.015  | 0.131  | c   |
|                             | Cologne Fall   | 0.218  | 0.032 | 226 | 0.155  | 0.280  | cd  |
|                             | Valencia Fall  | 0.275  | 0.031 | 226 | 0.214  | 0.335  | d   |
|                             | Norwich Fall   | 0.291  | 0.033 | 226 | 0.225  | 0.357  | d   |
| Vernalization FRI:flc (Col) | Norwich Summer | -0.284 | 0.035 | 217 | -0.354 | -0.215 | a   |



|                             |                |        |       |     |        |        |    |
|-----------------------------|----------------|--------|-------|-----|--------|--------|----|
|                             | Cologne Spring | -0.213 | 0.042 | 217 | -0.296 | -0.129 | ab |
|                             | Norwich Spring | -0.158 | 0.036 | 217 | -0.229 | -0.087 | ab |
|                             | Oulu Summer    | -0.093 | 0.027 | 217 | -0.147 | -0.039 | bc |
|                             | Halle Fall     | 0.060  | 0.032 | 217 | -0.004 | 0.124  | cd |
|                             | Valencia Fall  | 0.169  | 0.032 | 217 | 0.105  | 0.233  | d  |
|                             | Cologne Fall   | 0.202  | 0.036 | 217 | 0.132  | 0.272  | d  |
|                             | Norwich Fall   | 0.226  | 0.037 | 217 | 0.153  | 0.298  | d  |
| Vernalization hua:FRI (Col) | Norwich Summer | -0.195 | 0.031 | 219 | -0.256 | -0.133 | a  |
|                             | Cologne Spring | -0.194 | 0.047 | 219 | -0.285 | -0.102 | ab |
|                             | Norwich Spring | -0.126 | 0.033 | 219 | -0.191 | -0.062 | ab |
|                             | Oulu Summer    | -0.033 | 0.024 | 219 | -0.080 | 0.015  | bc |
|                             | Halle Fall     | 0.071  | 0.029 | 219 | 0.014  | 0.129  | cd |
|                             | Cologne Fall   | 0.220  | 0.032 | 219 | 0.158  | 0.283  | de |
|                             | Valencia Fall  | 0.258  | 0.030 | 219 | 0.199  | 0.316  | e  |
|                             | Norwich Fall   | 0.318  | 0.034 | 219 | 0.251  | 0.384  | e  |

**Table S3.** Results of post-hoc tests from the linear model described in Table S2 among plantings using Tukey's honest significant differences at 95% confidence. LS means indicate least-squares means for photothermal time to bolting; SE is for standard error; df is for degrees of freedom; LCL is the lower confidence limit; UCL is the upper confidence limit; group represents significant difference within a genotype among plantings.

| planting       | coef     | trait                   | est.                                | SE     | p      | trait                  | est.                | SE                    | p      |       |     |
|----------------|----------|-------------------------|-------------------------------------|--------|--------|------------------------|---------------------|-----------------------|--------|-------|-----|
| Halle fall     | $\beta$  | Days to flowering (DTF) | -0.233                              | 0.061  | 0.2    | Leaf length at bolting | 0.383               | 0.077                 | 0.0    |       |     |
| Halle fall     | $\gamma$ |                         | -0.172                              | 0.030  | 0.0    |                        | 0.157               | 0.084                 | 1.0    |       |     |
| Norwich fall   | $\beta$  |                         | 0.127                               | 0.130  | 1.0    |                        | 0.214               | 0.121                 | 1.0    |       |     |
| Norwich fall   | $\gamma$ |                         | 0.055                               | 0.101  | 1.0    |                        | 0.033               | 0.184                 | 1.0    |       |     |
| Norwich spring | $\beta$  |                         | -0.308                              | 0.066  | 0.0    |                        | 0.149               | 0.083                 | 0.2    |       |     |
| Norwich spring | $\gamma$ |                         | 0.016                               | 0.051  | 1.0    |                        | -0.042              | 0.087                 | 1.0    |       |     |
| Norwich summer | $\beta$  |                         | 0.141                               | 0.040  | 0.0    |                        | 0.301               | 0.033                 | 0.0    |       |     |
| Norwich summer | $\gamma$ |                         | -0.090                              | 0.032  | 0.0    |                        | 0.052               | 0.047                 | 1.0    |       |     |
| Valencia fall  | $\beta$  |                         | -0.221                              | 0.058  | 0.0    |                        | NA                  | NA                    | NA     |       |     |
| Valencia fall  | $\gamma$ |                         | -0.273                              | 0.076  | 0.0    |                        | NA                  | NA                    | NA     |       |     |
| Halle fall     | $\beta$  |                         | Flowering photothermal units (FPTU) | -0.052 | 0.040  |                        | 1.0                 | Cauline branch number | 0.201  | 0.047 | 0.0 |
| Halle fall     | $\gamma$ |                         |                                     | 3.301  | 6.004  |                        | 1.0                 |                       | -0.028 | 0.062 | 1.0 |
| Norwich fall   | $\beta$  |                         |                                     | 0.177  | 0.100  |                        | 1.0                 |                       | 0.066  | 0.143 | 1.0 |
| Norwich fall   | $\gamma$ |                         |                                     | 6.287  | 14.301 |                        | 1.0                 |                       | 0.105  | 0.153 | 1.0 |
| Norwich spring | $\beta$  |                         |                                     | -0.351 | 0.068  |                        | 0.0                 |                       | 0.152  | 0.068 | 0.3 |
| Norwich spring | $\gamma$ |                         |                                     | 14.781 | 8.003  |                        | 1.0                 |                       | 0.031  | 0.068 | 1.0 |
| Norwich summer | $\beta$  | 0.141                   |                                     | 0.033  | 0.0    | 0.243                  | 0.056               |                       | 0.0    |       |     |
| Norwich summer | $\gamma$ | 0.001                   |                                     | 6.898  | 1.0    | -0.051                 | 0.058               |                       | 1.0    |       |     |
| Valencia fall  | $\beta$  | -0.151                  |                                     | 0.048  | 0.0    | 0.164                  | 0.068               |                       | 0.4    |       |     |
| Valencia fall  | $\gamma$ | -8.001                  |                                     | 27.041 | 1.0    | 0.032                  | 0.107               |                       | 1.0    |       |     |
| Halle fall     | $\beta$  | Initial leaf number     |                                     | 0.049  | 0.039  | 1.0                    | Basal branch number |                       | 0.525  | 0.053 | 0.0 |
| Halle fall     | $\gamma$ |                         |                                     | -0.192 | 0.084  | 0.4                    |                     |                       | 0.105  | 0.049 | 0.6 |
| Norwich fall   | $\beta$  |                         |                                     | 0.018  | 0.097  | 1.0                    |                     |                       | 0.637  | 0.073 | 0.0 |
| Norwich fall   | $\gamma$ |                         |                                     | -0.061 | 0.133  | 1.0                    |                     |                       | 0.305  | 0.206 | 0.8 |
| Norwich spring | $\beta$  |                         |                                     | NA     | NA     | NA                     |                     |                       | 0.387  | 0.053 | 0.0 |
| Norwich spring | $\gamma$ |                         |                                     | NA     | NA     | NA                     |                     |                       | 0.059  | 0.027 | 1.0 |
| Norwich summer | $\beta$  |                         | 0.077                               | 0.073  | 1.0    | 0.201                  |                     | 0.039                 | 0.0    |       |     |
| Norwich summer | $\gamma$ |                         | -0.018                              | 0.077  | 1.0    | 0.019                  |                     | 0.020                 | 1.0    |       |     |
| Valencia fall  | $\beta$  |                         | 0.000                               | 0.016  | 1.0    | 0.269                  |                     | 0.058                 | 0.0    |       |     |
| Valencia fall  | $\gamma$ |                         | 0.000                               | 0.082  | 1.0    | -0.072                 |                     | 0.046                 | 1.0    |       |     |
| Halle fall     | $\beta$  |                         | High order branch number            | 0.872  | 0.058  | 0.0                    |                     |                       |        |       |     |
| Halle fall     | $\gamma$ |                         |                                     | 0.301  | 0.173  | 1.0                    |                     |                       |        |       |     |
| Norwich fall   | $\beta$  |                         |                                     | 1.200  | 0.173  | 0.0                    |                     |                       |        |       |     |
| Norwich fall   | $\gamma$ |                         |                                     | 1.255  | 0.841  | 1.0                    |                     |                       |        |       |     |
| Norwich spring | $\beta$  |                         |                                     | 0.755  | 0.044  | 0.0                    |                     |                       |        |       |     |
| Norwich spring | $\gamma$ |                         |                                     | -0.141 | 0.178  | 1.0                    |                     |                       |        |       |     |
| Norwich summer | $\beta$  | 0.610                   |                                     | 0.052  | 0.0    |                        |                     |                       |        |       |     |
| Norwich summer | $\gamma$ | 0.067                   |                                     | 0.154  | 1.0    |                        |                     |                       |        |       |     |
| Valencia fall  | $\beta$  | 0.873                   |                                     | 0.072  | 0.0    |                        |                     |                       |        |       |     |
| Valencia fall  | $\gamma$ | 0.051                   |                                     | 0.229  | 1.0    |                        |                     |                       |        |       |     |

**Table S4.** Selection coefficients for *Arabidopsis thaliana* traits in five field environments, analogous to partial derivatives of polynomial regression techniques.  $\beta$  is analogous to the directional selection coefficient and  $\gamma$  is analogous to the stabilizing or disruptive coefficient. Coef stands for coefficients; est. for the estimate of this coefficient; SE for numerically approximated standard error; and p for p-value. Shaded cells indicate significance greater than  $\alpha=0.05$ .

| planting       | trait                    | N   | $\mu$  | $H^2$ | df | trait                      | N   | $\mu$   | $H^2$ | df |
|----------------|--------------------------|-----|--------|-------|----|----------------------------|-----|---------|-------|----|
| Halle fall     | Basal branch number      | 332 | 9.4    | 0.56  | 45 | Initial leaf number        | 277 | 2.0     | 0.49  | 45 |
| Norwich fall   |                          | 197 | 4.2    | 0.27  | 45 |                            | 201 | 3.0     | 0.54  | 46 |
| Norwich spring |                          | 367 | 2.6    | 0.27  | 44 |                            | 369 | 1.4     | 0.24  | 44 |
| Norwich summer |                          | 346 | 2.5    | 0.28  | 46 |                            | 335 | 3.1     | 0.19  | 46 |
| Valencia fall  |                          | 315 | 7.5    | 0.28  | 45 |                            | 317 | 2.4     | 0.33  | 45 |
| Halle fall     | Cauline branch number    | 331 | 5.5    | 0.52  | 45 | days to flowering (DTF)    | 318 | 159.6   | 0.90  | 45 |
| Norwich fall   |                          | 196 | 2.2    | 0.29  | 45 |                            | 191 | 81.7    | 0.74  | 46 |
| Norwich spring |                          | 366 | 4.8    | 0.44  | 44 |                            | 366 | 60.3    | 0.85  | 44 |
| Norwich summer |                          | 345 | 2.3    | 0.26  | 46 |                            | 342 | 31.5    | 0.64  | 46 |
| Valencia fall  |                          | 312 | 4.5    | 0.33  | 45 |                            | 308 | 92.7    | 0.71  | 45 |
| Halle fall     | High order branch number | 332 | 54.7   | 0.26  | 45 | FPTU                       | 318 | 9457.4  | 0.87  | 45 |
| Norwich fall   |                          | 197 | 12.0   | 0.33  | 45 |                            | 191 | 10326.0 | 0.77  | 46 |
| Norwich spring |                          | 367 | 15.9   | 0.56  | 44 |                            | 366 | 8228.8  | 0.85  | 44 |
| Norwich summer |                          | 346 | 10.5   | 0.40  | 46 |                            | 342 | 9038.0  | 0.64  | 46 |
| Valencia fall  |                          | 315 | 50.5   | 0.30  | 45 |                            | 308 | 10356.4 | 0.74  | 45 |
| Halle fall     | Main branch number       | 331 | 0.9    | 0.37  | 45 | Leaf length at bolting     | 177 | 27.5    | 0.73  | 44 |
| Norwich fall   |                          | 196 | 0.7    | 0.20  | 45 |                            | 198 | 25.2    | 0.34  | 46 |
| Norwich spring |                          | 367 | 1.0    | 0.14  | 44 |                            | 364 | 18.8    | 0.60  | 44 |
| Norwich summer |                          | 346 | 0.9    | 0.20  | 46 |                            | 341 | 15.6    | 0.66  | 46 |
| Valencia fall  |                          | 314 | 0.8    | 0.29  | 45 |                            | 61  | 31.8    | 0.40  | 15 |
| Halle fall     | Days to bolting          | 320 | 108.1  | 0.84  | 45 | Total branch number        | 332 | 64.9    | 0.30  | 45 |
| Norwich fall   |                          | 198 | 62.6   | 0.78  | 46 |                            | 197 | 16.8    | 0.34  | 45 |
| Norwich spring |                          | 367 | 53.7   | 0.86  | 44 |                            | 367 | 19.5    | 0.54  | 44 |
| Norwich summer |                          | 343 | 24.9   | 0.73  | 46 |                            | 346 | 13.8    | 0.41  | 46 |
| Valencia fall  |                          | 303 | 83.3   | 0.73  | 45 |                            | 317 | 58.4    | 0.30  | 45 |
| Halle fall     | BPTU                     | 320 | 7082.7 | 0.87  | 45 | fitness (seed proxy units) | 333 | 12078.8 | 0.33  | 45 |
| Norwich fall   |                          | 198 | 9136.1 | 0.79  | 46 |                            | 201 | 1896.2  | 0.31  | 46 |
| Norwich spring |                          | 367 | 7004.8 | 0.86  | 44 |                            | 369 | 4475.8  | 0.33  | 44 |
| Norwich summer |                          | 343 | 7172.8 | 0.73  | 46 |                            | 346 | 2297.8  | 0.43  | 46 |
| Valencia fall  |                          | 303 | 9169.9 | 0.74  | 45 |                            | 317 | 7111.6  | 0.27  | 45 |

**Table S5.** Ratio of genetic variation to phenotypic variation estimates for *Arabidopsis thaliana* mutant and parental ecotypes. BPTU and FPTU are the number of accumulated photothermal units to bolting and flowering, respectively. N is the number of plants included in the analysis;  $\mu$  is the trait mean;  $H^2$  is the ratio of genetic to phenotypic variation as a proxy estimate for broad-sense heritability; and d.f. is the degrees of freedom.

## Supplemental Information References

1. Bouche F, Lobet G, Tocquin P, & Perilleux C (2016) FLOR-ID: an interactive database of flowering-time gene networks in *Arabidopsis thaliana*. *Nucleic acids research* 44(D1):D1167-D1171.
2. Pose D, Yant L, & Schmid M (2012) The end of innocence: flowering networks explode in complexity. *Current opinion in plant biology* 15(1):45-50.
3. Song YH, Ito S, & Imaizumi T (2013) Flowering time regulation: photoperiod- and temperature-sensing in leaves. *Trends in plant science* 18(10):575-583.
4. Pajoro A, *et al.* (2014) The (r)evolution of gene regulatory networks controlling *Arabidopsis* plant reproduction: a two-decade history. *J Exp Bot* 65(17):4731-4745.
5. Glover B (2014) *Understanding Flowers and Flowering: An Integrated Approach, 2nd Edition* (Oxford University Press, Oxford, UK) pp 1-292.
6. Fornara F, de Montaigu A, & Coupland G (2010) SnapShot: Control of Flowering in *Arabidopsis*. *Cell* 141(3).
7. Fernandez V, Takahashi Y, Le Gourrierc J, & Coupland G (2016) Photoperiodic and thermosensory pathways interact through CONSTANS to promote flowering at high temperature under short days. *Plant J* 86(5):426-440.
8. An HL, *et al.* (2004) CONSTANS acts in the phloem to regulate a systemic signal that induces photoperiodic flowering of *Arabidopsis*. *Development* 131(15):3615-3626.
9. Huang H & Nusinow DA (2016) Into the Evening: Complex Interactions in the *Arabidopsis* Circadian Clock. *Trends in Genetics* 32(10):674-686.
10. Shim JS, Kubota A, & Imaizumi T (2017) Circadian Clock and Photoperiodic Flowering in *Arabidopsis*: CONSTANS Is a Hub for Signal Integration. *Plant physiology* 173(1):5-15.
11. Sung SB & Amasino RM (2004) Vernalization in *Arabidopsis thaliana* is mediated by the PHD finger protein VIN3. *Nature* 427(6970):159-164.
12. Wood CC, *et al.* (2006) The *Arabidopsis thaliana* vernalization response requires a polycomb-like protein complex that also includes VERNALIZATION INSENSITIVE 3. *Proceedings of the National Academy of Sciences of the United States of America* 103(39):14631-14636.
13. Kim DH, Doyle MR, Sung S, & Amasino RM (2009) Vernalization: Winter and the Timing of Flowering in Plants. *Annual review of cell and developmental biology* 25:277-299.
14. Thompson L (1994) The Spatiotemporal Effects of Nitrogen and Litter on the Population Dynamics of *Arabidopsis thaliana*. *J Ecol* 82(1):63-68.
15. Wilczek AM, *et al.* (2009) Effects of Genetic Perturbation on Seasonal Life History Plasticity. *Science* 323(5916):930-934.
16. Burghardt LT, Metcalf CJE, Wilczek AM, Schmitt J, & Donohue K (2015) Modeling the Influence of Genetic and Environmental Variation on the Expression of Plant Life Cycles across Landscapes. *American Naturalist* 185(2):212-227.
17. Taylor MA, *et al.* (2017) Interacting effects of genetic variation for seed dormancy and flowering time on phenology, life history, and fitness of experimental *Arabidopsis thaliana* populations over multiple generations in the field. *New Phytologist*.

18. Wilczek AM, *et al.* (2010) Genetic and physiological bases for phenological responses to current and predicted climates. *Philos T R Soc B* 365(1555):3129-3147.
19. Kim DH & Sung S (2013) Coordination of the Vernalization Response through a VIN3 and FLC Gene Family Regulatory Network in Arabidopsis. *The Plant cell* 25(2):454-469.
20. Antoniou-Kourounioli RL, *et al.* (2018) Temperature Sensing Is Distributed throughout the Regulatory Network that Controls FLC Epigenetic Silencing in Vernalization. *Cell Syst* 7(6):643-+.
21. Clack T, *et al.* (2009) Obligate Heterodimerization of Arabidopsis Phytochromes C and E and Interaction with the PIF3 Basic Helix-Loop-Helix Transcription Factor. *The Plant cell* 21(3):786-799.
22. Bae G & Choi G (2008) Decoding of light signals by plant phytochromes and their interacting proteins. *Annual review of plant biology* 59:281-311.
23. Chew YH, *et al.* (2012) An augmented Arabidopsis phenology model reveals seasonal temperature control of flowering time. *New Phytologist* 194(3):654-665.
24. Wilczek AM, *et al.* (2009) Effects of genetic perturbation on seasonal life history plasticity. *Science* 323(5916):930-934.
25. Johanson U, *et al.* (2000) Molecular analysis of FRIGIDA, a major determinant of natural variation in Arabidopsis flowering time. *Science* 290(5490):344-347.
26. He YH, Michaels SD, & Amasino RM (2003) Regulation of flowering time by histone acetylation in Arabidopsis. *Science* 302(5651):1751-1754.
27. Michaels SD, Bezerra IC, & Amasino RM (2004) FRIGIDA-related genes are required for the winter-annual habit in Arabidopsis. *Proceedings of the National Academy of Sciences of the United States of America* 101(9):3281-3285.
28. Doyle MR, *et al.* (2005) HUA2 is required for the expression of floral repressors in Arabidopsis thaliana. *Plant J* 41(3):376-385.
29. Balasubramanian S, Sureshkumar S, Lempe J, & Weigel D (2006) Potent induction of Arabidopsis thaliana flowering by elevated growth temperature. *PLoS genetics* 2(7):980-989.
30. Kim HJ, *et al.* (2004) A genetic link between cold responses and flowering time through FVE in Arabidopsis thaliana. *Nature genetics* 36(2):167-171.
31. Peng JR, *et al.* (1997) The Arabidopsis GAI gene defines a signaling pathway that negatively regulates gibberellin responses. *Genes & development* 11(23):3194-3205.
32. Park DH, *et al.* (1999) Control of circadian rhythms and photoperiodic flowering by the Arabidopsis GIGANTEA gene. *Science* 285(5433):1579-1582.
33. Lee H, *et al.* (2000) The AGAMOUS-LIKE 20 MADS domain protein integrates floral inductive pathways in Arabidopsis. *Genes & development* 14(18):2366-2376.
34. Jacobsen SE, Binkowski KA, & Olszewski NE (1996) SPINDLY, a tetratricopeptide repeat protein involved in gibberellin signal transduction Arabidopsis. *Proceedings of the National Academy of Sciences of the United States of America* 93(17):9292-9296.
35. Larsson AS, Landberg K, & Meeks-Wagner DR (1998) The TERMINAL FLOWER2 (TFL2) gene controls the reproductive transition and meristem identity in Arabidopsis thaliana. *Genetics* 149(2):597-605.
36. Bagnall DJ, King RW, & Hangarter RP (1996) Blue-light promotion of flowering is absent in hy4 mutants of Arabidopsis. *Planta* 200(2):278-280.

37. Blazquez MA & Weigel D (2000) Integration of floral inductive signals in Arabidopsis. *Nature* 404(6780):889-892.
38. Putterill J, Robson F, Lee K, Simon R, & Coupland G (1995) The Constans Gene of Arabidopsis Promotes Flowering and Encodes a Protein Showing Similarities to Zinc-Finger Transcription Factors. *Cell* 80(6):847-857.
39. Johnson E, Bradley M, Harberd NP, & Whitelam GC (1994) Photoresponses of Light-Grown Phyto Mutants of Arabidopsis - Phytochrome-a Is Required for the Perception of Daylength Extensions. *Plant physiology* 105(1):141-149.
40. Bagnall DJ, *et al.* (1995) Flowering Responses to Altered Expression of Phytochrome in Mutants and Transgenic Lines of Arabidopsis-Thaliana (L) Heynh. *Plant physiology* 108(4):1495-1503.
41. Guo HW, Yang WY, Mockler TC, & Lin CT (1998) Regulations of flowering time by Arabidopsis photoreceptors. *Science* 279(5355):1360-1363.
42. Aukerman MJ, *et al.* (1997) A deletion in the PHYD gene of the Arabidopsis Wassilewskija ecotype defines a role for phytochrome D in red/far-red light sensing. *The Plant cell* 9(8):1317-1326.
43. Devlin PF, Patel SR, & Whitelam GC (1998) Phytochrome E influences internode elongation and flowering time in Arabidopsis. *The Plant cell* 10(9):1479-1487.
